# Supplementary material for: New Canadian and Provincial Records of Coleoptera Resulting from Annual Canadian Food Inspection Agency Surveillance for Detection of Non-Native, Potentially Invasive Forest Insects
Source: MDPI journal article supplement (doi:10.3390/insects13080708), 2022-08-06
Supplement: s1 [file s1]

## Supplementary Materials

Table S1. Traps and lures used by the Canadian Food Inspection Agency and the years they were deployed in annual surveys for adventive bark- and wood-boring insects inadvertently introduced to Canada via international import of goods, human-assisted movement, or natural dispersal. With exception of monochamol and ipsenol (released from the same lure), each component of a multi-lure combination consisted of a separate lure and each lure was placed on the same trap, e.g., traps baited with the 'general longhorn lure' had three lures attached: fuscumol, fuscumol acetate, and UHR ethanol  
UHR = Ultra High Release rate.orrected

| Trap                                               | Lure                                                                                              | Years deployed | Target taxa                                                                                               | New Provincial Records <sup>3</sup> |
|----------------------------------------------------|---------------------------------------------------------------------------------------------------|----------------|-----------------------------------------------------------------------------------------------------------|-------------------------------------|
| Black Lindgren, collecting cup 30 cm above ground  | UHR ethanol                                                                                       | 2011           | Curculionidae, (esp. ambrosia beetles), Cerambycidae that attack broadleaf trees                          | 1                                   |
|                                                    | UHR ethanol + UHR alpha-pinene                                                                    | 2011           | Cerambycidae, Buprestidae, Curculionidae that attack conifers                                             | 1                                   |
|                                                    | Racemic 3-hydroxyhexan-2-one + racemic 3-hydroxyoctan-2-one + UHR ethanol                         | 2012–16        | Cerambycidae (esp. Cerambycinae), Curculionidae, that attack either conifers or broadleaf trees           | 2                                   |
|                                                    | ( <i>E,Z</i> )-fuscumol + ( <i>E,Z</i> )-fuscumol acetate + UHR ethanol (= general longhorn lure) | 2015–21        | Cerambycidae (esp. Lamiinae, Spondylidinae), Curculionidae that attack either conifers or broadleaf trees | 14c                                 |
|                                                    | Monochamol + ipsenol + UHR $\alpha$ -pinene + UHR ethanol                                         | 2015–21        | Cerambycidae (esp. Lamiinae), Curculionidae that attack conifers                                          | 8                                   |
| Green Lindgren, placed in tree canopy <sup>2</sup> | 3-methyl-2-buten-1-ol <sup>1</sup>                                                                | 2013           |                                                                                                           | 1                                   |
|                                                    | Racemic 3-hydroxyhexan-2-one + racemic 3-hydroxyoctan-2-one + UHR ethanol                         | 2016           | Cerambycidae, Buprestidae, Curculionidae                                                                  | 1                                   |

|                                                       |                                                                                  |         |                                                                                                  |   |
|-------------------------------------------------------|----------------------------------------------------------------------------------|---------|--------------------------------------------------------------------------------------------------|---|
| Black Lindgren,<br>placed in canopy <sup>2</sup>      | ( <i>E,Z</i> )-fusicumol + ( <i>E,Z</i> )-<br>fusicumol acetate + UHR<br>ethanol | 2018–19 | more active in<br>tree canopy<br>Cerambycidae,<br>Curculionidae<br>more active in<br>tree canopy | 1 |
| Green Lindgren,<br>placed in tree canopy <sup>2</sup> | ( <i>E,Z</i> )-fusicumol + ( <i>E,Z</i> )-<br>fusicumol acetate + UHR<br>ethanol | 2018–21 | Cerambycidae,<br>Buprestidae,<br>Curculionidae<br>more active in<br>tree canopy                  | 2 |

---

<sup>1</sup> Ontario Ministry of Natural Resources record; <sup>2</sup> Canopy traps were deployed in only a small number of survey locations as part of pilot project <sup>3</sup> Number of new species records detected by the trap-lure combination; this sums to more than a total of 31 records because some species were detected by more than one type of trap-lure combination.

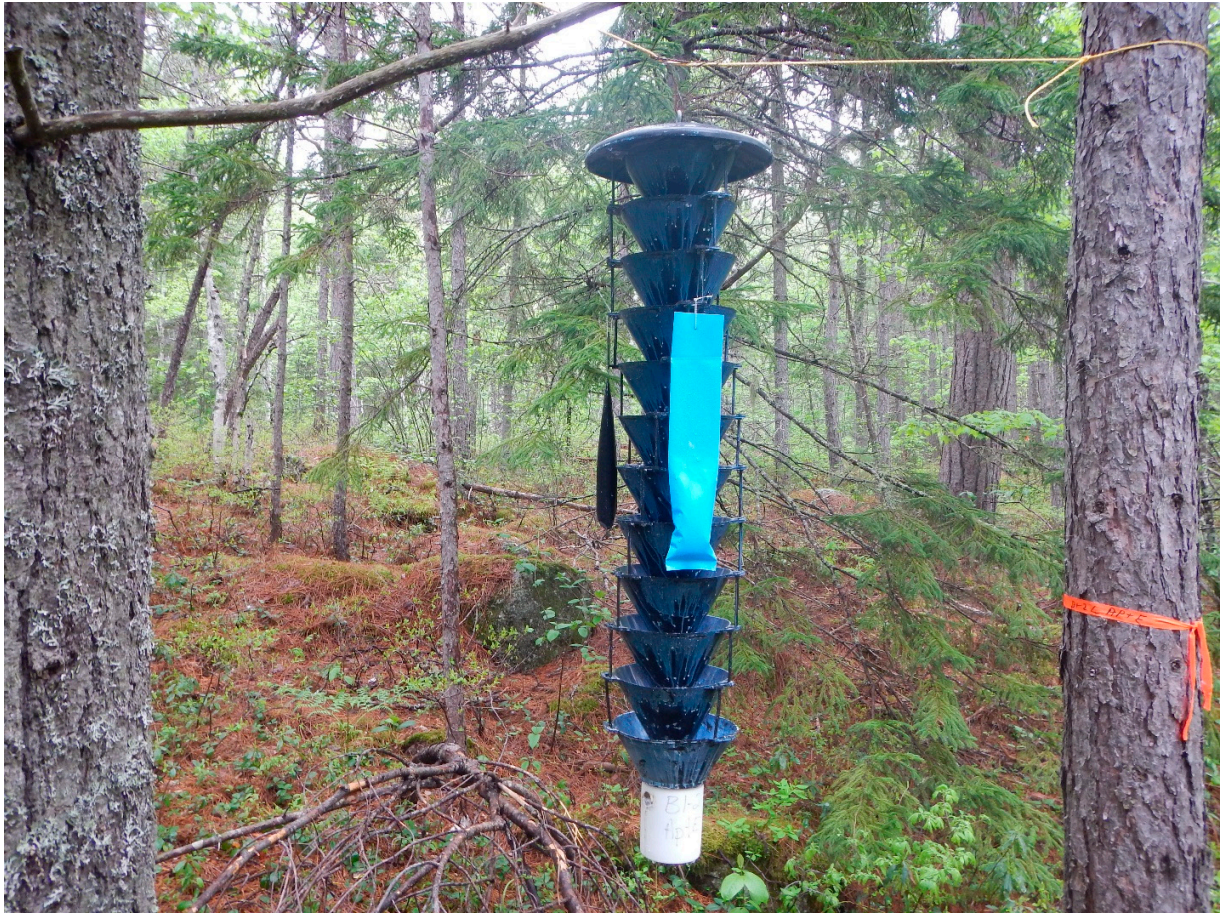

Figure S1. Black 12-funnel Lindgren trap suspended from rope tied between trees with collecting cup 30-50 cm above forest floor.

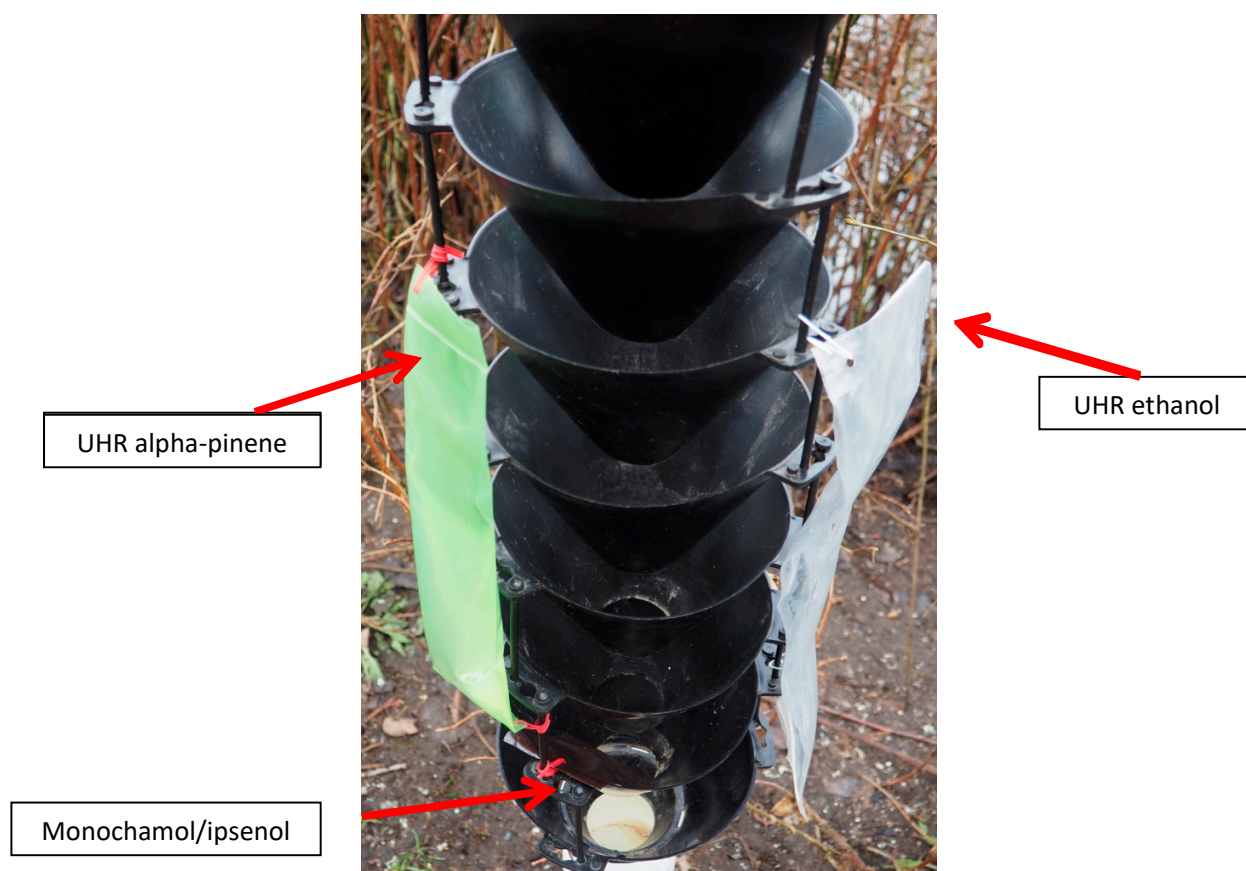

Figure S2. Close up of black Lindgren funnel trap showing example of lure placement for traps baited with monochamol/ipsenol, UHR ethanol and UHR alpha-pinene.



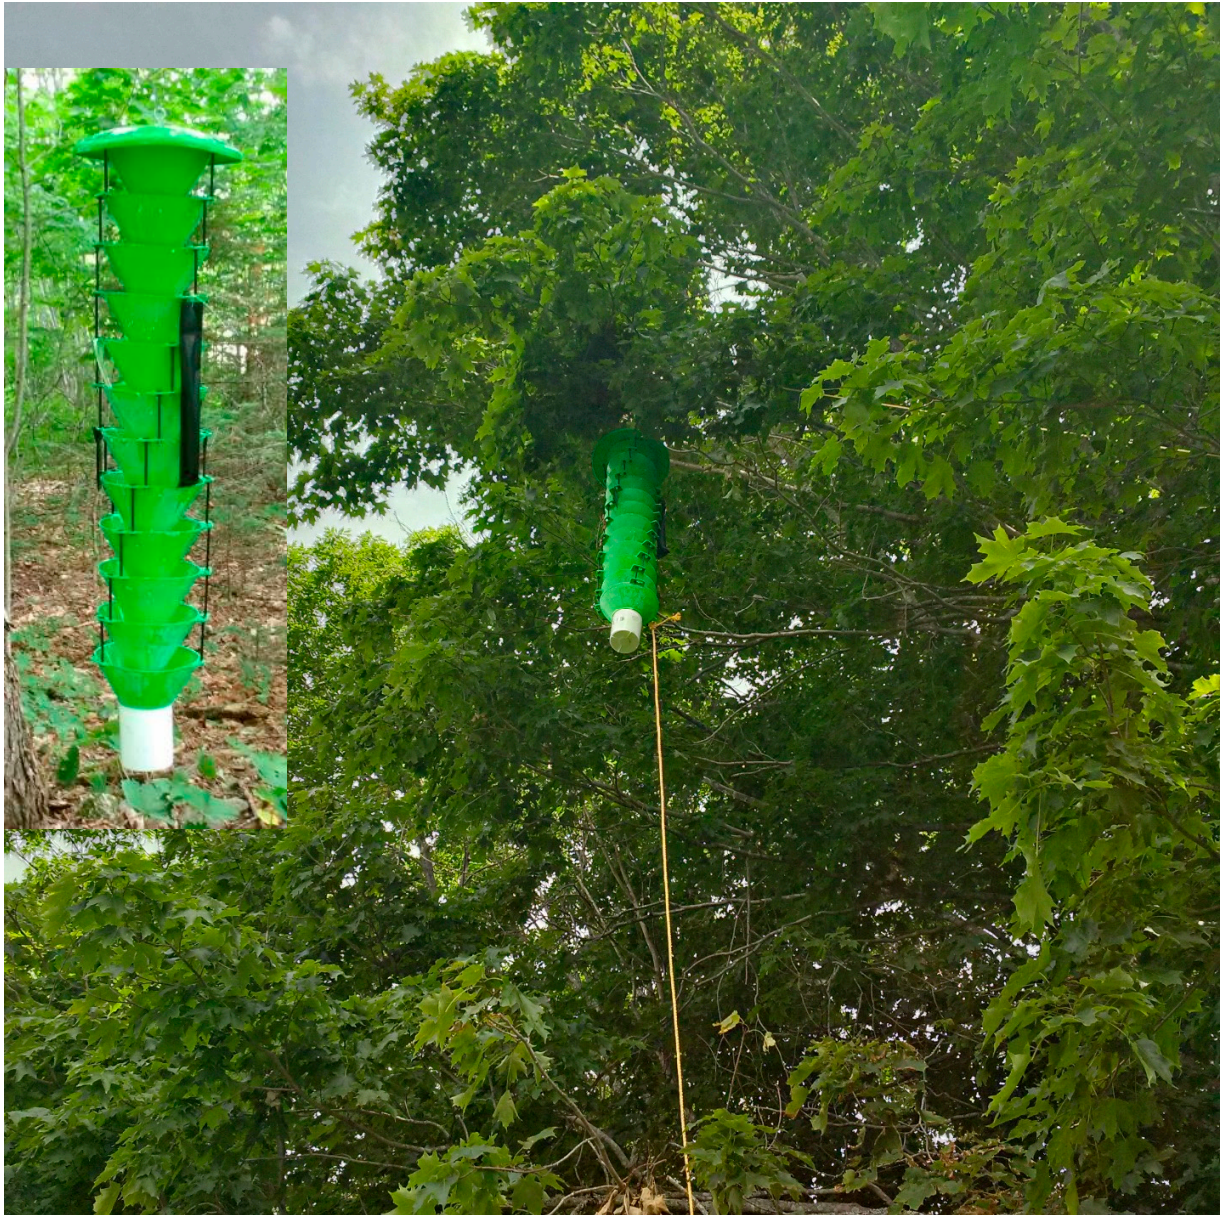

Figure S3. Green 12-funnel Lindgren trap (inset) and showing trap position in the upper canopy of a broadleaf tree.
